# Supplementary material for: Asymmetron: a toolkit for the identification of strand asymmetry patterns in biological sequences
Source: PubMed Central journal article supplement (PMC7797064; doi:10.1093/nar/gkaa1052), 2020-11-19
Supplement: gkaa1052_supplemental_file.pdf [file gkaa1052_supplemental_file.pdf]

**Supplementary Table 1: Transcriptional and replicative strand asymmetries of Alu and L1 repeat subfamilies.** Transcriptional and replicative strand asymmetry ratios are calculated as the occurrences in one orientation (leading or non-template) over the total number of occurrences in both orientations. Ratios above 0.5 indicate non-template and leading orientation preference, while ratios below 0.5 indicate template and lagging orientation preference for transcriptional and replicative strand asymmetries. Displayed p-values are from binomial testing with Bonferroni correction.

| Repeat Subfamily | Repeat transcriptional strand asymmetry ratio | Repeat transcriptional strand asymmetry p-value | Repeat replicative strand asymmetry ratio | Repeat replicative strand asymmetry p-value |
|------------------|-----------------------------------------------|-------------------------------------------------|-------------------------------------------|---------------------------------------------|
| AluJ             | 0.472                                         | <0.001                                          | 0.534                                     | <0.001                                      |
| AluS             | 0.449                                         | <0.001                                          | 0.531                                     | <0.001                                      |
| AluY             | 0.459                                         | <0.001                                          | 0.525                                     | <0.001                                      |
| L1M              | 0.373                                         | <0.001                                          | 0.542                                     | <0.001                                      |
| L1P              | 0.409                                         | <0.001                                          | 0.523                                     | <0.001                                      |

**Supplementary Table 2: Breakpoint transcriptional and replicative strand asymmetries of Alu and L1 repeat subfamilies.** Adjusted transcriptional and replicative strand asymmetry ratios for breakpoints at repeats are displayed. Log<sub>2</sub>(adjusted strand asymmetry ratios) above 0 indicate non-template and leading orientation preference, while log<sub>2</sub>(adjusted strand asymmetry ratios) below 0 indicate template and lagging orientation preference for the breakpoints at Alu or L1 repeats. Displayed p-values are from binomial testing with Bonferroni correction.

| Repeat Subfamily | Breakpoint transcriptional strand asymmetry log <sub>2</sub> (adjusted strand asymmetry ratios) | Breakpoint transcriptional strand asymmetry p-value | Breakpoint replicative strand asymmetry log <sub>2</sub> (adjusted strand asymmetry ratios) | Breakpoint replicative strand asymmetry p-value |
|------------------|-------------------------------------------------------------------------------------------------|-----------------------------------------------------|---------------------------------------------------------------------------------------------|-------------------------------------------------|
| AluJ             | -0.040                                                                                          | >0.05                                               | 0.017                                                                                       | >0.05                                           |
| AluS             | -0.056                                                                                          | <0.001                                              | 0.023                                                                                       | <0.001                                          |
| AluY             | -0.056                                                                                          | <0.001                                              | 0.014                                                                                       | >0.05                                           |
| L1M              | -0.008                                                                                          | >0.05                                               | 0.004                                                                                       | >0.05                                           |
| L1P              | -0.163                                                                                          | <0.001                                              | 0.063                                                                                       | <0.001                                          |
